# Supplementary material for: Novel heterogeneous CdS nanoparticles/NiTiO3 nanorods with enhanced visible-light-driven photocatalytic activity
Source: Royal Society of Chemistry journal article supplement (doi:10.1039/c3ra42189a), 2013-01-01
Supplement: c3ra42189a.pdf [file c3ra42189a.pdf]

# A novel heterogeneous CdS nanoparticles/NiTiO<sub>3</sub> nanorod with enhanced visible-light-driven photocatalytic activity

Yang Qu,<sup>1,2</sup> Wei Zhou,<sup>2</sup> Le Jiang,<sup>2</sup> and Honggang Fu<sup>\*1,2</sup>

<sup>1</sup> State Key Laboratory of Theoretical and Computational Chemistry, Institute of Theoretical Chemistry, Jilin University, Changchun 130023, P. R. China

<sup>2</sup> Key Laboratory of Functional Inorganic Material Chemistry, Ministry of Education of the People's Republic of China, Heilongjiang University, Harbin 150080 P. R. China

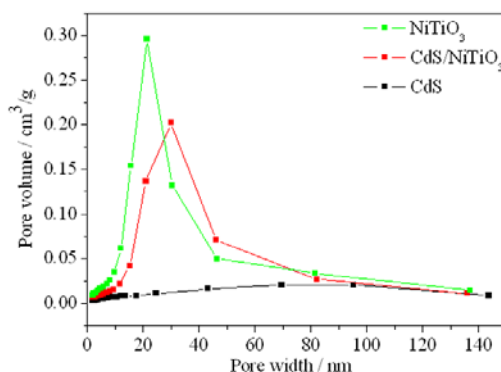

Figure S1. The average pores distribution of NiTiO<sub>3</sub> nanorods, CdS nanoparticles and heterogeneous CdS nanoparticles/NiTiO<sub>3</sub> nanorods.

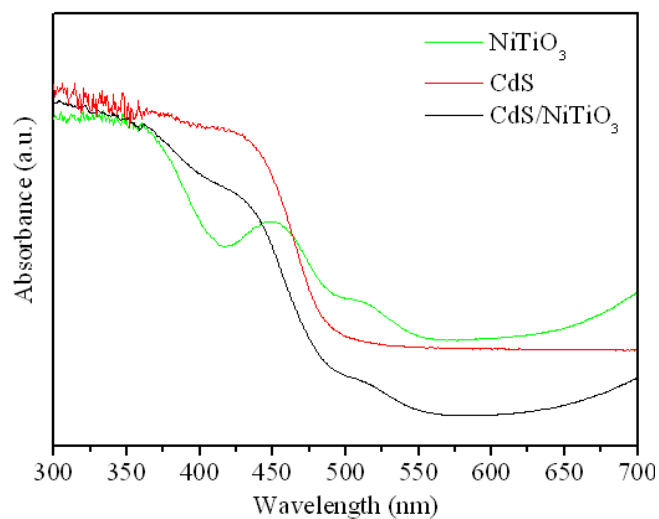

Figure S2. UV-vis diffuses reflection spectroscopy of  $\text{NiTiO}_3$  nanorods, CdS nanoparticles and heterogeneous CdS nanoparticles/ $\text{NiTiO}_3$  nanorods.

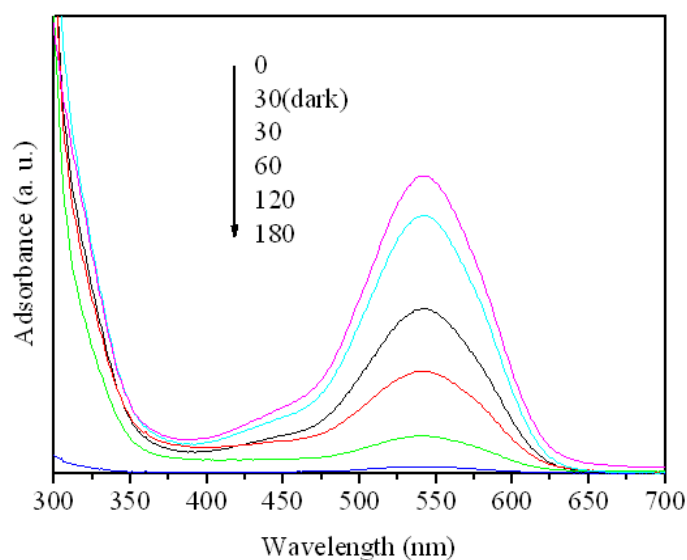

Figure S3. UV-vis spectra of aqueous solutions of Cr (VI) after photocatalytic reaction by the diphenylcarbazide method of heterogeneous CdS nanoparticles/ $\text{NiTiO}_3$  nanorods for different times irradiation.

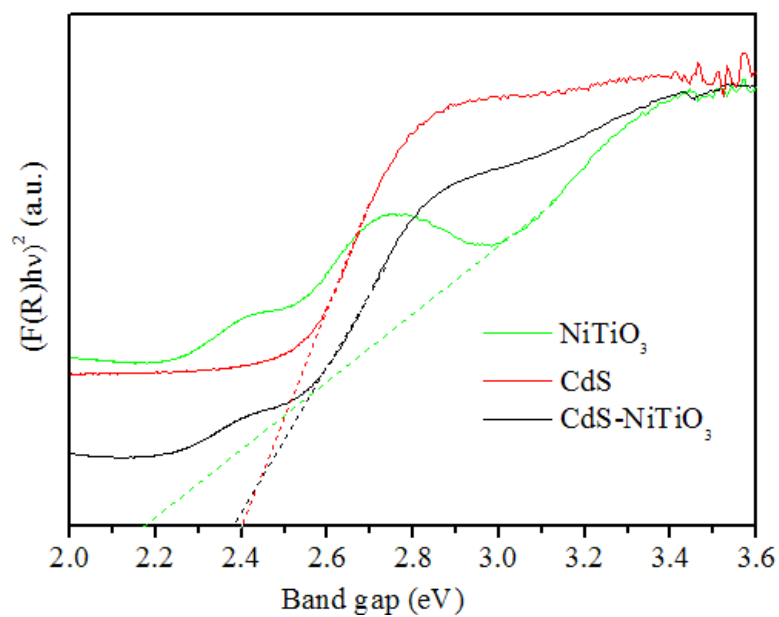

Figure S4. Plots of  $(F(R)hv)^2$  versus  $(hv)$  for obtaining the band gaps of NiTiO<sub>3</sub> nanorods, CdS nanoparticles and heterogeneous CdS nanoparticles/NiTiO<sub>3</sub> nanorods.

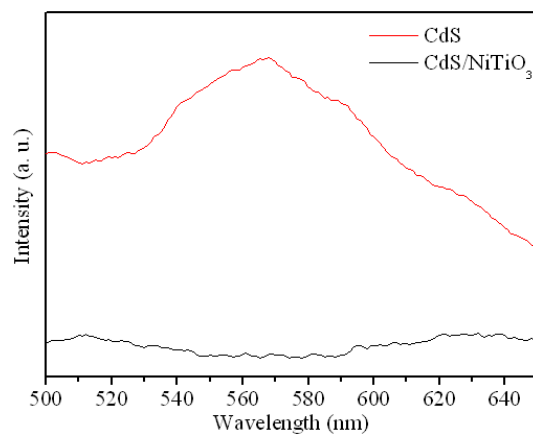

Figure S5. PL spectra of CdS nanoparticles and heterogeneous CdS nanoparticles/NiTiO<sub>3</sub> nanorods.

Table S1. The band gap and conductor band data with respect to Absolute Vacuum Scale (AVS) for common semiconductors.

| Semiconductors      | CdS   | NiTiO <sub>3</sub> | TiO <sub>2</sub> | ZnO   | SrTiO <sub>3</sub> | KTaO <sub>3</sub> |
|---------------------|-------|--------------------|------------------|-------|--------------------|-------------------|
| Band gap (eV)       | 2.4   | 2.18               | 3.2              | 3.2   | 3.4                | 3.5               |
| Conductor band (eV) | -3.98 | -4.70              | -4.21            | -4.19 | -3.24              | -3.57             |

The band structure data was obtained from Ref. 17.

Table S2. The Concentration of Cd<sup>2+</sup> in the solution after 1h irradiation of photocatalytic reduction of Cr (VI).

| Reaction                                                                                          | Photocatalytic reduction of Cr(VI) |            |
|---------------------------------------------------------------------------------------------------|------------------------------------|------------|
| Samples                                                                                           | CdS/NiTiO <sub>3</sub>             | CdS        |
| Concentration of Cd <sup>2+</sup> in<br>the solution after 1h<br>irradiation of<br>photocatalysis | 0.063 mg/L                         | 1.134 mg/L |

It was measured by atomic absorption spectrometry (AAS, Thermo Elemental SOLAAR-M, limit of identification: 5 µg L<sup>-1</sup>). The samples were centrifuged and filtered through 0.22 µm nominal pore-size membrane filters prior to analysis.
